# Evaluation of the $\alpha$ -synuclein PET radiotracer (d<sub>3</sub>)-[<sup>11</sup>C]MODAG-001 in pigs

Nakul Ravi Raval<sup>1,2</sup>, Clara Aabye Madsen<sup>-1,2</sup>, Vladimir Shalgunov<sup>-3,4</sup>, Arafat Nasser<sup>1</sup>, Umberto Maria Battisti<sup>3</sup>, Emily Eufaula Beaman<sup>1</sup>, Morten Juhl<sup>5</sup>, Louise Møller Jørgensen<sup>1,2,6</sup>, Matthias Manfred Herth<sup>3,4</sup>, Hanne Demant Hansen<sup>1</sup>, Pontus Plavén-Sigra<sup>1</sup>, Gitte Moos Knudsen<sup>\*1,2</sup>

<sup>1</sup>Neurobiology Research Unit, Copenhagen University Hospital (Rigshospitalet), Copenhagen, Denmark

<sup>2</sup>Department of Clinical Medicine, Faculty of Health and Medical Sciences, University of Copenhagen, Copenhagen, Denmark

<sup>3</sup>Department of Drug Design and Pharmacology, Faculty of Health and Medical Sciences, University of Copenhagen, Copenhagen, Denmark

<sup>4</sup>Department of Clinical Physiology, Nuclear Medicine & PET, Copenhagen University Hospital (Rigshospitalet), Copenhagen, Denmark

<sup>5</sup>Cardiology Stem Cell Centre, Copenhagen University Hospital (Rigshospitalet), Copenhagen, Denmark

<sup>6</sup>Copenhagen Spine Research Unit, Copenhagen University Hospital (Rigshospitalet), Copenhagen, Denmark

-Contributed equally

\*Corresponding author

Corresponding author:

Gitte Moos Knudsen

Neurobiology Research Unit

Section 8057, Rigshospitalet

Blegdamsvej 9

DK-2100 Copenhagen Ø

Denmark

Email: [gmk@nru.dk](mailto:gmk@nru.dk)

## Abstract

### Background:

A positron emission tomography (PET) radiotracer to neuroimage  $\alpha$ -synuclein aggregates would be a crucial addition for early diagnosis and treatment development in disorders such as Parkinson's disease, where elevated aggregate levels is a histopathological hallmark. The radiotracer (d<sub>3</sub>)-[<sup>11</sup>C]MODAG-001 has recently shown promise for visualization of  $\alpha$ -synuclein

34 pre-formed fibrils ( $\alpha$ -PFF) in rodents. We here test the radiotracer in a pig model where proteins  
35 are intracerebrally injected immediately before scanning. Four pigs were injected in one  
36 hemisphere with 150  $\mu$ g  $\alpha$ -PFF, and in the other hemisphere, either 75  $\mu$ g  $\alpha$ -PFF or human  
37 brain homogenate from either dementia with Lewy bodies (DLB) or Alzheimer's disease (AD)  
38 was injected. All pigs underwent one or two ( $d_3$ )-[ $^{11}$ C]MODAG-001 PET scans, quantified with  
39 the non-invasive Logan graphical analysis using the occipital cortex as a reference region.

#### 40 **Results:**

41 The  $\alpha$ -PFF and AD homogenate injected brain regions had high uptake of ( $d_3$ )-[ $^{11}$ C]MODAG-001  
42 compared to the occipital cortex or cerebellum.  $BP_{ND}$  values in 150  $\mu$ g  $\alpha$ -PFF injected regions  
43 was 0.78, and in the AD homogenate injected regions was 0.73. By contrast, the DLB  
44 homogenate injected region did not differ in uptake and clearance compared to the reference  
45 regions. The time-activity curves and  $BP_{ND}$  values in the 150  $\mu$ g and 75  $\mu$ g injected region of  $\alpha$ -  
46 PFFs show a dose-dependent effect, and the PET signal could be blocked by pretreatment with  
47 unlabeled MODAG-001.

#### 48 **Conclusion:**

49 We find that both  $\alpha$ -PFF and AD brain homogenates give rise to increased binding of ( $d_3$ )-  
50 [ $^{11}$ C]MODAG-001 when injected into the pig brain. Despite its limited specificity for cerebral  $\alpha$ -  
51 synuclein pathology, ( $d_3$ )-[ $^{11}$ C]MODAG-001 shows promise as a lead tracer for future radiotracer  
52 development.

## 53 **Keywords**

54 Alpha-synuclein, PET tracer, Positron emission tomography, intracerebral protein injection,  
55 amyloid-beta, brain imaging, larger animal PET, pig model

## 56 Background

57 Parkinson's disease (PD), dementia with Lewy bodies (DLB), and multiple system atrophy  
58 (MSA) are histopathologically characterized by progressive nigrostriatal, limbic and neocortical  
59 neurodegeneration and aggregation of the intracellular presynaptic protein  $\alpha$ -synuclein [1–3].  
60 These diseases are collectively known as  $\alpha$ -synucleinopathies [4]. Patients with PD or DLB  
61 have  $\alpha$ -synuclein-rich neuronal inclusions called Lewy bodies and Lewy neurites, predominantly  
62 in the substantia nigra in PD and throughout the cerebral cortex in DLB [5]. On the other hand,  
63 patients with MSA show filamentous aggregates in oligodendrocytes and neurons [6]. However,  
64 it is yet unknown to which extent  $\alpha$ -synuclein aggregates contribute to neurodegeneration  
65 (Wong and Krainc 2017), and further, the clinical diagnosis of a PD or PD+ disorder is difficult,  
66 particularly in the early phases [7]. In drug-naive patients with subtle clinical parkinsonian motor  
67 symptoms, dopamine transporter neuroimaging has high sensitivity and specificity in  
68 distinguishing between patients with and without striatal neurodegeneration [8] but access to a  
69 neuroimaging tool to specifically assess  $\alpha$ -synuclein aggregates would be a highly valuable  
70 addition.

71 Positron emission tomography (PET) has proven valuable for the detection of amyloid- $\beta$  and tau  
72 protein aggregates and is used for differential diagnosis and drug development evaluation for  
73 neurodegenerative conditions such as Alzheimer's disease (AD) [9]. PET imaging of  $\alpha$ -synuclein  
74 would be advantageous for, e.g., early disease detection, differential diagnosis, and monitoring  
75 disease progression of synucleinopathies. In addition, the field is moving towards early  
76 eradication of  $\alpha$ -synuclein aggregates as a promising therapeutic strategy in  $\alpha$ -  
77 synucleinopathies, an approach that would require in vivo imaging for clinical application. As of  
78 today, no clinically validated PET radioligand exists for imaging  $\alpha$ -synuclein [10, 11].

79 Several attempts to develop a suitable radioligand for  $\alpha$ -synuclein have been made, and some  
80 tracers looked promising in rodents [12–16]. One of these is the diphenylpyrazole derivative  
81 [ $^{11}\text{C}$ ]MODAG-001/ $(\text{d}_3)$ -[ $^{11}\text{C}$ ]MODAG-001 [12]. It was developed from the lead structure  
82 anle138b, a compound with therapeutic properties in PD and MSA rodent models due to its  
83 binding characteristics to  $\alpha$ -synuclein aggregates [17, 18]. Anle138b and its derivatives, like  
84 [ $^3\text{H}$ ]/[ $^{11}\text{C}$ ]MODAG-001, have undergone extensive in vitro and rodent biodistribution experiments  
85 [12, 19].  $(\text{d}_3)$ -[ $^{11}\text{C}$ ]MODAG-001 showed the most promise as a candidate radioligand for  
86 detecting  $\alpha$ -synuclein aggregates due to its high affinity, good brain penetration, and ability to  
87 detect  $\alpha$ -synuclein pre-formed fibril ( $\alpha$ -PFF) in a protein deposition rat model [12].

88 In the present study, we test and characterize  $(\text{d}_3)$ -[ $^{11}\text{C}$ ]MODAG-001 in a large animal model. To  
89 evaluate binding characteristics to  $\alpha$ -synuclein aggregates, we use a pig model where  $\alpha$ -PFF is  
90 intracerebrally injected (ICI) immediately before scanning, creating an artificial target brain  
91 region [20]. We assess the sensitivity of the radioligand to identify  $\alpha$ -synucleinopathy DLB  
92 human brain homogenate injected in the pig brain. The binding selectivity to  $\alpha$ -synuclein is  
93 assessed by comparison to a brain region where amyloid and tau pathology-rich AD human  
94 brain homogenate is injected.

## 95 Methods

### 96 Radiochemistry

97 Precursor and reference compound for  $(\text{d}_3)$ -[ $^{11}\text{C}$ ]MODAG-001 were prepared as previously  
98 described [12]; see supplementary information for more details.  $(\text{d}_3)$ -[ $^{11}\text{C}$ ]MODAG-001 was  
99 obtained by reductive amination of desmethyl precursor with [ $^{11}\text{C}$ ]CH<sub>2</sub>O. The radioactivity yield  
100 was  $650 \pm 297$  MBq (mean  $\pm$  SD) (n=9, range 250-1214) after 70 min of synthesis time. The

101 radiochemical purity of the formulated tracer was >95%. Radiochemical conversion from  
102 trapped [<sup>11</sup>C]CH<sub>3</sub>I was 45±2 % (n=6). Molar activity at the end of the radioligand synthesis was  
103 on average 28.14±5.3 GBq/μmol.

## 104 Animals

105 We included four female domestic pigs (crossbreed of Landrace, Yorkshire, and Duroc)  
106 weighing 27±1 kg and aged 10-11 weeks (Table 1). Before any experiments, pigs were sourced  
107 from a local farm and acclimatized for 7-10 days in an enriched environment.

## 108 Preparation and surgical procedure

109 A detailed description of the preparation, anesthesia, surgery, and transport has previously  
110 been described [21, 22]. Briefly, anesthesia was induced with an intramuscular (IM) injection of  
111 Zoletil mixture and maintained with 10-15 mg/kg/h propofol intravenous (IV) infusion. Analgesia  
112 was achieved with 5 μg/kg/h fentanyl IV infusion. Endotracheal intubation allowed for ventilation  
113 with 34% oxygen in normal air at 10-12 mL/kg. The left and right superficial mammary veins, ear  
114 veins, and femoral arteries were catheterized for venous and arterial access. The animals' heart  
115 rate, blood pressure, peripheral oxygen saturation (SpO<sub>2</sub>), end-tidal CO<sub>2</sub> (EtCO<sub>2</sub>), blood  
116 glucose, and temperature were monitored throughout the scan. Using a modified stereotactic  
117 approach [20], pigs were intracerebrally injected into the medial prefrontal cortex (mPFC) with  
118 25 μL of 3 or 6 mg/mL α-PFF (molecular weight of monomer: 14,460 Da, corresponding to 208  
119 μM or 415 μM) (produced at H. Lundbeck A/S, Copenhagen, Denmark), AD human brain  
120 homogenate (10% homogenate in saline [α-synuclein aggregates -ve]) or DLB human brain  
121 homogenate (10% homogenate in saline [amyloid-β and tau aggregates -ve]), as outlined for  
122 each pig in Table 1. The post-mortem human brain homogenates used in this study are the  
123 same as described previously [20], namely a homogenate mixture of two regions (frontal and

124 temporal) from 2 different patients with each disease (i.e., AD and DLB). In a previous study, the  
 125 injection target point in the mPFC: 8, 25, 14 mm in X, Y, Z coordinates relative to bregma was  
 126 validated [20]. After the surgical procedure, the animals were transported to the scanner  
 127 facilities.

128

129 **Table 1.** Pig characteristics: Body weight, injectate in the PFC, injected dose/mass of (d<sub>3</sub>)-  
 130 [<sup>11</sup>C]MODAG-001, and availability of blocking and test-retest scans.

| Pig no. | Weight (kg) | Injection in the right PFC | Injection in the left PFC | (d <sub>3</sub> )-[ <sup>11</sup> C]MODAG-001 |                                         | MODAG-001 blocking study | Test-retest |
|---------|-------------|----------------------------|---------------------------|-----------------------------------------------|-----------------------------------------|--------------------------|-------------|
|         |             |                            |                           | Scan 1: Injected dose (MBq) & mass (µg)       | Scan 2: Injected dose (MBq) & mass (µg) |                          |             |
| 1       | 28          | DLB homogenate             | 150µg<br>α-PFF            | 181 MBq<br>(3.18 µg)                          | -                                       | -                        | -           |
| 2       | 25          | AD homogenate              | 150µg<br>α-PFF            | 334 MBq<br>(7.43 µg)                          | -                                       | -                        | -           |
| 3       | 26          | 75µg<br>α-PFF              | 150µg<br>α-PFF            | 359 MBq<br>(6.75 µg)                          | 436 MBq<br>(8 µg)                       | -                        | ☑           |
| 4       | 29          | 75µg<br>α-PFF              | 150µg<br>α-PFF            | 322 MBq<br>(6.64 µg)                          | 302 MBq<br>(4.58 µg)                    | ☑                        | -           |

**150µg α-PFF:** α-synuclein preformed fibrils (150µg/25µL, 415 µM)  
**75µg α-PFF:** α-synuclein preformed fibrils (75µg/25µL, 208 µM)  
**DLB homogenate:** Dementia with Lewy bodies human brain homogenate (10%, 25µL) [Braak stage II, n=2 x2 regions, Aβ and tau -ve]  
**AD homogenate:** Alzheimer's disease human brain homogenate (10%, 25µL) [Braak stage IV, n=2 x2 regions, α-syn -ve]  
**MODAG-001 block:** 1 mg/kg dissolved in 19% dimethyl sulfoxide in saline

## 131 PET scanning protocol

132 Pigs were PET-scanned either once or twice (same day) in a Siemens high-resolution research  
 133 tomograph (HRRT) scanner (CTI /Siemens, Malvern, PA, USA). (d<sub>3</sub>)-[<sup>11</sup>C]MODAG-001 was  
 134 injected as a rapid bolus (~20 seconds) through one of the superficial mammary veins (IV), and  
 135 PET data were acquired over 121 min. Molar activity at the time of injection was 19.0±2.1

136 GBq/ $\mu$ mol (injected dose and mass in Table 1). Pig 3 received a test-retest on the same day. In  
137 Pig 4, we perform a self-blocking study with 1 mg/kg non-deuterated unlabelled MODAG-001.  
138 Unlabelled MODAG-001 (29.1 mg) was dissolved in 40 mL of saline with 19% dimethyl sulfoxide  
139 to ensure full solubility and injected IV over 15 min starting ~6 min before the injection of (d<sub>3</sub>)-  
140 [<sup>11</sup>C]MODAG-001.

## 141 Blood sampling and radio-HPLC analysis

142 Radio-HPLC analysis of plasma samples were performed in Pig 4 for both baseline and block  
143 scans. Manual arterial blood samples were drawn at 1.5, 5, 20, 40, and 60 min after injection.  
144 Samples were also drawn at 90 and 120 min, but data is not shown due to low and noisy  
145 radioactivity counts. Pig 4 also received a third injection of (d<sub>3</sub>)-[<sup>11</sup>C]MODAG-001 (180 MBq,  
146 3.74  $\mu$ g) to assess radiometabolites crossing the blood-brain barrier for which a blood and brain  
147 sample was acquired at 15 min and 22 min post tracer injection. A blood sample was drawn  
148 before injection of 20 mL pentobarbital/lidocaine for euthanasia. Immediately after, the skull was  
149 exposed, and the occipital bone was sawed open. A small brain sample from the occipital cortex  
150 was excised and rinsed in saline to remove excessive blood. Radiolabeled parent and  
151 metabolite fractions were determined in plasma and brain tissue using isocratic elution, as  
152 previously described [12], but with some modifications (details in Supplementary information).

## 153 *In vitro* methodologies

154 After the last scanning, the animals were euthanized by IV injection of 20 mL pentobarbital and  
155 lidocaine. After euthanasia, the brains were removed, snap-frozen with powdered dry-ice, and

156 stored at  $-20^{\circ}\text{C}$  until further use. Intracerebrally injections were confirmed using fluorescence

157 immunohistochemistry; procedure and results are available in the supplementary data.

## 158 PET data reconstruction and preprocessing

159 PET scans were reconstructed using ordinary Poisson 3D ordered subsets expectation-  
160 maximization, including modeling the point-spread function, using 16 subsets, ten iterations, and  
161 standard corrections [23]. Attenuation correction was performed using the MAP-TR  $\mu$ -map [24].  
162 Emission data were binned into time frames of increasing lengths:  
163  $6 \times 10$  s,  $6 \times 20$  s,  $4 \times 30$  s,  $9 \times 60$  s,  $8 \times 120$  s,  $4 \times 180$  s,  $2 \times 240$  s,  $1 \times 300$  s,  $1 \times 360$  s,  $1 \times$   
164  $420$  s,  $1 \times 600$  s,  $1 \times 900$  s, and  $1 \times 1680$  s. Each frame consisted of 207 planes of  $256 \times 256$   
165 voxels of  $1.22 \times 1.22 \times 1.22$  mm in size. Brain parcellation was performed according to our  
166 previously published automatic PET-MR pig brain atlas method [25]. The input for the  
167 methodology was frame-length weighted, summed PET images of the total scan time (0–120  
168 min). Time-activity curves (TACs) from the neocortex, occipital cortex, temporal cortex,  
169 cerebellum (here defined as without vermis), and injection regions were extracted for the  
170 present study. The regions of the injection sites were delineated as described in our previous  
171 study [20], while all other regions were part of the Saikali atlas [26] modified for PET [25].

## 172 Pharmacokinetic modeling

173 For image quantification, we used the non-invasive Logan graphical analysis [27] with the  
174 occipital cortex and cerebellum as reference regions. In order to estimate the average  $k_2$  over  
175  $R_1$  ratio ( $k_2'$ ), we applied the simplified reference tissue model (SRTM) [28] to high binding  
176 regions (i.e.,  $\alpha$ -PFF injected regions) and calculated  $k_2'$ . For the non-invasive Logan plot, we  
177 chose the threshold time,  $t^*$ , of 23 min (last 15 frames) since it showed the lowest average  
178 maximum percentage of variance.  $BP_{ND}$  values estimated using the occipital cortex as a  
179 reference region were more stable than those derived using the cerebellum. These are  
180 therefore presented in the results section below.

181 All kinetic modeling was performed using the “*kinfitr*” package (v. 0.6.1) (Matheson, 2019;  
182 Tjerkaski et al., 2020) in R (v. 4.0.2; “Taking Off Again,” R core team, Vienna, Austria).



183 For the pig that received a test-retest scan, we calculated the % test-rest change using Equation

184 1. For the pig that received a baseline-block scan, we calculated the % blocking in the  $\alpha$ -PFF

185 injected regions using Equation 2.

186

$$187 \text{ TrT change (\%)} = \left( \frac{\text{mean}(\text{test2: all region } BP_{ND}) - \text{mean}(\text{test1: all region } BP_{ND})}{\text{mean}(\text{test1 \& test2: all region } BP_{ND})} \right) \times 100 \quad (\text{Eq. 1})$$

$$188 \text{ Blocking (\%)} = \left( \frac{BP_{ND}(\text{baseline}) - BP_{ND}(\text{block})}{BP_{ND}(\text{baseline})} \right) \times 100 \quad (\text{Eq. 2})$$

189 Regional radioactivity concentration (kBq/mL) was normalized to injected dose (MBq) and

190 corrected for the animal weight (kg) to provide standardized uptake values (SUV, g/mL) used in

191 graphical plots in Figures 1 and 3. PMOD 3.7 (PMOD Technologies, Zürich, Switzerland) was

192 used to visualize and create all representative PET images (Figure 1 and 3), which are summed

193 images over the entire period of the scan (0-121 min) with the “Triangle” PMOD pixel

194 interpolation function; for more details see

195 “<https://www.pmod.com/files/download/v31/doc/pbas/4145.htm>”. Graph-Pad Prism (v. 9.2.0;

196 GraphPad Software, San Diego, CA, USA) was used for data visualization.

## 197 Results

### 198 Brain uptake and kinetics of (d<sub>3</sub>)-[<sup>11</sup>C]MODAG-001

199 We observed high brain uptake (~ 2.5 SUV) and a relatively quick radioligand wash-out after

200 (d<sub>3</sub>)-[<sup>11</sup>C]MODAG-001 injection. The plasma kinetics of (d<sub>3</sub>)-[<sup>11</sup>C]MODAG-001 were relatively

201 fast, with approximately 10% of the parent radioligand remaining in plasma after 20 min

202 (Supplementary Figure 1). Regions with either 150  $\mu$ g (n = 4) or 75  $\mu$ g (n = 2)  $\alpha$ -PFF and AD

203 homogenate (n = 1) had higher radioactivity retention (Figure 1A-C and Figure 2A) compared to

204 the occipital cortex and cerebellum. By contrast, the DLB homogenate region (n = 1) TAC  
205 behaved essentially as background tissue radiotracer retention (Figure 1A). Almost identical  
206 TACs were seen in the pig with test-retest scans (Supplementary Figure 2). In a pig euthanized  
207 15 min after tracer injection, 10.8% of (d<sub>3</sub>)-[<sup>11</sup>C]MODAG-001 parent compound remained in the  
208 plasma while 56.1 % parent compound remained in brain homogenate from the occipital cortex  
209 (Supplementary Table 1). The remaining signal from the plasma and brain came from polar and  
210 non-polar radiometabolites (Supplementary Table 1).

## 211 Blocking experiment using MODAG-001

212 Pretreatment with 1 mg/kg MODAG-001 shortly before the injection of (d<sub>3</sub>)-[<sup>11</sup>C]MODAG-001  
213 significantly reduced the radioactive signal in the 150 µg and 75 µg α-PFF regions, which  
214 showed substantially faster radioligand kinetics than the regional baseline TACs (Figure 2B); the  
215 TACs became comparable to those in the occipital cortex and cerebellum (Figure 3B).

## 216 Kinetic modeling of (d<sub>3</sub>)-[<sup>11</sup>C]MODAG-001

217 BP<sub>ND</sub> in different brain regions are shown in Figure 3A. BP<sub>ND</sub> in the 150 µg α-PFF regions was  
218 0.78 ± 0.1 (mean±SD, n = 4) while in the 75 µg regions, BP<sub>ND</sub> α-PFF injected regions was 0.29  
219 (n = 2), showing a dose-dependent effect of (d<sub>3</sub>)-[<sup>11</sup>C]MODAG-001 binding to the α-PFF. BP<sub>ND</sub> in  
220 the AD homogenate region was 0.73, in the same order as the 150 µg α-PFF. The DLB  
221 homogenate region, cerebellum, and temporal cortex had BP<sub>ND</sub> values close to zero (Figure  
222 3A). The (d<sub>3</sub>)-[<sup>11</sup>C]MODAG-001 test-retest scan on the same day showed a -6.2% change in  
223 BP<sub>ND</sub> (Supplementary figure 2). Pretreatment with MODAG-001 resulted in a reduction in  
224 regional binding levels such that they became comparable to the reference regions. In the pig  
225 that underwent a baseline-block study, we observed >100% occupancy in the α-PFF injected

226 regions. A modest reduction in binding was also observed in the temporal cortex and  
227 cerebellum (Figure 3B).

## 228 Discussion

229 PET neuroimaging of aggregated protein has proved critical for diagnosing and monitoring  
230 disease progression and treatment evaluation in neurodegenerative diseases with amyloid- $\beta$   
231 and tau pathology [29, 30]. The ability to detect and quantify  $\alpha$ -synuclein aggregates in the living  
232 human brain would be a milestone achievement for the research of PD and other  $\alpha$ -  
233 synucleinopathies [10, 31]. Due to its high affinity to  $\alpha$ -synuclein and favorable binding in rodent  
234 models, [ $^{11}\text{C}$ ]MODAG-001 and its analogs are currently some of the most promising  
235 radioligands for  $\alpha$ -synuclein neuroimaging [12, 19].

236 To the best of our knowledge, this is the first time ( $\text{d}_3$ )-[ $^{11}\text{C}$ ]MODAG-001 has been tested in a  
237 higher species and shown promising translational results. We evaluated ( $\text{d}_3$ )-[ $^{11}\text{C}$ ]MODAG-001  
238 in a pig model of intracerebral injection of  $\alpha$ -PFF and postmortem human AD and DLB brain  
239 homogenates. We see high brain uptake and quick-wash out of the radioligand in the brain. The  
240 pharmacokinetics in healthy mice and the  $\alpha$ -PFF rat model were comparable to that in pigs [12].  
241 We saw a relatively high uptake of the radioligand in the  $\alpha$ -PFF regions at micromolar  
242 concentrations, with a dose-dependent response with 150  $\mu\text{g}$  (415  $\mu\text{M}$ ) and 75  $\mu\text{g}$  (208  $\mu\text{M}$ )  
243 injections (Figure 1-3).

244 Kuebler et al. tested both [ $^{11}\text{C}$ ]MODAG-001 and the deuterium incorporated ( $\text{d}_3$ )-[ $^{11}\text{C}$ ]MODAG-  
245 001 [12]; deuterium incorporation was meant to improve the pharmacokinetic and metabolic  
246 profile of the radioligand [32]. Notably, we observed faster metabolism in the pigs than what was  
247 observed in the mice, which are much smaller mammals [33]. The results showed that  $\sim 10\%$   
248 parent fraction remained 15 min post-injection in the pigs, compared to  $\sim 30\%$  parent fraction in

249 mice. Radio-HPLC on brain homogenate (non-perfused) from a pig euthanized at 15 min  
250 showed ~50% parent fraction; in contrast, mice showed on average ~90% parent fraction after  
251 15 min (Supplementary Figure 1, Supplementary Table 1).

252 We performed the non-invasive kinetic modeling with the occipital cortex as a reference region  
253 since we previously have shown in our pig model that the occipital cortex has similar tissue  
254 properties as saline-injected target regions and that these are not affected by the intracerebral  
255 injection [22].

256 Due to the lack of other high-affinity molecules, an unlabelled MODAG-001 block scan was our  
257 best option to examine the signal specificity. Pretreatment of 1 mg/kg of MODAG-001 leads to  
258 complete blocking of the specific (d<sub>3</sub>)-[<sup>11</sup>C]MODAG-001 binding in the α-PFF injected region. We  
259 observe a very high blocking percentage with values above 100% (using BP<sub>ND</sub> values from  
260 reference modeling), although these estimates are based on only one pig and likely prone to  
261 noise.

262 We also see high uptake in the amyloid-β and tau-rich AD homogenates but no significant  
263 uptake in the DLB homogenate region (Figure 1 and 3); this is remarkable since DLB is  
264 considered to have a pure α-synuclein pathology. Ideally, a radioligand should have high α-  
265 synuclein selectivity for it to distinguish α-synuclein aggregates from amyloid-β and tau  
266 aggregates [10, 34]. Several things make us less enthusiastic about the prospect of (d<sub>3</sub>)-  
267 [<sup>11</sup>C]MODAG-001 as a radioligand in human studies: (d<sub>3</sub>)-[<sup>11</sup>C]MODAG-001 did not display high  
268 binding in the DLB homogenate region; this could be due to low concentrations of aggregated α-  
269 synuclein, as is most often seen in human pathology, especially at early disease stages. This  
270 null-finding could also be due to the hypothesized difference in pathological morphology in pure  
271 α-synuclein DLB subjects [35]. (d<sub>3</sub>)-[<sup>11</sup>C]MODAG-001 was also not very selective for α-synuclein  
272 and had significant binding to the AD homogenate region. This observation is also on par with

273 previous autoradiography studies where the highest uptake was noted in human brain sections  
274 with AD [12]. Improving the signal-to-background ratio and selectivity will be critical for the  
275 further development of the tracer, and this work is currently ongoing [12].

276 The intracerebral protein injection model used in the current study also comes with a set of  
277 limitations. Since the intracerebral injections are done a few hours prior to scanning, it is unlikely  
278 that protein aggregates enter into the brain cells, which does not mimic the intracellular  
279 inclusions seen in  $\alpha$ -synucleinopathies well [3, 5]. The concentration of the  $\alpha$ -PFF in the model  
280 is much higher than that of diseased brains, where  $\alpha$ -synuclein is found to be at nanomolar  
281 concentration [12, 36]. This particular setup allowed us to show proof of concept for  $\alpha$ -synuclein  
282 aggregate detecting radioligands. The signal-to-background ratio of  $(d_3)$ - $[^{11}C]$ MODAG-001  
283 makes it challenging to detect pathologically relevant  $\alpha$ -synuclein, i.e., at nanomolar  
284 concentrations.

285 In spite of the poor specificity and relatively modest signal-to-background ratio, we believe that  
286  $(d_3)$ - $[^{11}C]$ MODAG-001 with its high affinity for  $\alpha$ -synuclein is a suitable lead molecule for further  
287 radioligand development and evaluation.

## 288 Conclusions

289 We demonstrate in vivo detection of  $\alpha$ -PFF in pigs using  $(d_3)$ - $[^{11}C]$ MODAG-001, which has  
290 previously only been shown using a similar  $\alpha$ -PFF injection rat model. The radioligand shows  
291 excellent brain kinetics and test-retest variability. Although  $(d_3)$ - $[^{11}C]$ MODAG-001 displays low  
292 specificity towards  $\alpha$ -synuclein and a potential passage of radiometabolites through the blood-  
293 brain barrier, it shows promise as a lead tracer for further radiotracer development.

## 294 List of abbreviations

- 295  $\alpha$ -PFF:  $\alpha$ -synuclein preformed fibrils
- 296 AD: Alzheimer's disease
- 297 BP<sub>ND</sub>: binding potential non-displaceable
- 298 DLB: dementia with Lewy bodies
- 299 HRRT: high-resolution research tomograph
- 300 IV: intra-venous
- 301 IM: intra-muscular
- 302 mPFC: medial prefrontal cortex
- 303 MSA: multiple system atrophy
- 304 PD: Parkinson's disease
- 305 PET: positron emission tomography
- 306 R-HPLC: radio-high performance liquid chromatography
- 307 SRTM: simplified reference tissue model
- 308 SUV: standardized uptake values
- 309 TAC: time-activity curve

## 310 **Declarations**

### 311 **Ethics approval**

- 312 All animal procedures were performed in accordance with the European Commission's Directive
- 313 2010/63/EU, as well as the ARRIVE guidelines, and were approved by the Danish Council of
- 314 Animal Ethics (Journal no. 2017-15-0201-01375).

### 315 **Consent for publication**

316 Not applicable

## 317 Availability of data and material

318 All data, including R scripts, is available at a GitHub repository

319 ([https://github.com/nakulrraval/Protien\\_inj\\_pig\\_model\\_MODAG001](https://github.com/nakulrraval/Protien_inj_pig_model_MODAG001)). All other requests are

320 directed to this article's corresponding or first author.

## 321 Competing interests

322 Lundbeck A/S, Denmark provided the  $\alpha$ -synuclein preformed fibrils as part of the European

323 Union's Horizon 2020 research and innovation program under the Marie Skłodowska-Curie

324 grant agreement No. 813528. However, they had no other financial interests in the project. GMK

325 received honoraria as a speaker and consultant for Sage Pharmaceuticals/Biogen and Sanos

326 A/S. All other authors declare no conflict of interest.

## 327 Funding

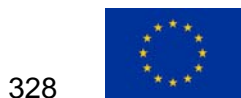

329 This project has received funding from the European Union's Horizon 2020 research and

330 innovation program under the Marie Skłodowska-Curie grant agreement No. 813528. This

331 project also received funding from Parkinsonforeningen, Denmark (R16-A247). Pontus Plavén

332 Sigray was supported by the Lundbeck Foundation (R303-2018-3263). Vladimir Shalgunov was

333 supported by the Lundbeck Foundation (R303-2018-3567), the Novo Nordisk Foundation (grant

334 agreement no. NNF18SA0034956), and BRIDGE – Translational Excellence Program at the

335 Faculty of Health and Medical Sciences, University of Copenhagen.

## 336 Authors' contribution

337 NRR, MMH, HDH, PPS, GMK: conceptualization and design. NRR, CAM, EEB, LMJ, HDH:  
338 surgical setup and PET scanning. VS, AN, UMB: compound synthesis, radiochemistry, and  
339 HPLC analysis. NRR, VS, AN, UMB, MJ, PPS: analysis and software. NRR, MMH, HDH, GMK:  
340 resources. NR, HDH, PPS, GMK: data curation. LMJ, MMH, HDH, PPS, GMK: supervision.  
341 NRR: preparation of manuscript draft including figures. NRR, CAM, VS, AN, UMB, EEB, MJ,  
342 LMJ, MMH, HDH, PPS, GMK: manuscript review and editing. NRR, MMH, GMK: funding  
343 acquisition. All authors have read and agreed to the current version of the manuscript.

## 344 Acknowledgments

345 We want to thank Lundbeck A/S, Valby, Denmark, for providing the  $\alpha$ -synuclein preformed  
346 fibrils. This research project received human brain tissue from the Neuropathology Core of the  
347 Emory Center for Neurodegenerative Disease; we are grateful for their support. We would  
348 sincerely like to thank the staff and veterinarians at EMED, Panum, København University, and  
349 the PET and cyclotron unit at Rigshospitalet. Further, we would like to thank Ran Sing Saw,  
350 Marko Rosenholm, and Natalie Beschorner for their help during PET scans. We also extend our  
351 thanks to Ran Sing Saw for scientific discussions.

## 352 References:

- 353 1. Braak H, Braak E (2000) Pathoanatomy of Parkinson's disease. *J Neurol* 247 Suppl 2:II3–  
354 10
- 355 2. Vekrellis K, Xilouri M, Emmanouilidou E, Rideout HJ, Stefanis L (2011) Pathological roles of  
356  $\alpha$ -synuclein in neurological disorders. *Lancet Neurol* 10:1015–1025



- 357 3. Lashuel HA, Overk CR, Oueslati A, Masliah E (2013) The many faces of  $\alpha$ -synuclein: from  
358 structure and toxicity to therapeutic target. *Nat Rev Neurosci* 14:38–48
- 359 4. Alafuzoff I, Hartikainen P (2017) Alpha-synucleinopathies. *Handb Clin Neurol* 145:339–353
- 360 5. Goedert M, Jakes R, Spillantini MG (2017) The Synucleinopathies: Twenty Years On. *J*  
361 *Parkinsons Dis* 7:S51–S69
- 362 6. Valera E, Masliah E (2018) The neuropathology of multiple system atrophy and its  
363 therapeutic implications. *Auton Neurosci* 211:1–6
- 364 7. Tolosa E, Wenning G, Poewe W (2006) The diagnosis of Parkinson’s disease. *Lancet*  
365 *Neurol* 5:75–86
- 366 8. Ziebell M, Andersen BB, Thomsen G, Pinborg LH, Karlsborg M, Hasselbalch SG, Knudsen  
367 GM (2012) Predictive value of dopamine transporter SPECT imaging with [<sup>123</sup>I]PE2I in  
368 patients with subtle parkinsonian symptoms. *Eur J Nucl Med Mol Imaging* 39:242–250
- 369 9. Tjepolt S, Patt M, Aghakhanyan G, Meyer PM, Hesse S, Barthel H, Sabri O (2019) Current  
370 radiotracers to image neurodegenerative diseases. *EJNMMI Radiopharm Chem* 4:17
- 371 10. Korat Š, Bidesi NSR, Bonanno F, et al (2021) Alpha-Synuclein PET Tracer Development—  
372 An Overview about Current Efforts. *Pharmaceuticals* 14:847
- 373 11. Bidesi NSR, Vang Andersen I, Windhorst AD, Shalgunov V, Herth MM (2021) The role of  
374 neuroimaging in Parkinson’s disease. *J Neurochem* 159:660–689
- 375 12. Kuebler L, Buss S, Leonov A, et al (2020) [11C]MODAG-001—towards a PET tracer  
376 targeting  $\alpha$ -synuclein aggregates. *Eur J Nucl Med Mol Imaging*.  
377 <https://doi.org/10.1007/s00259-020-05133-x>

- 378 13. Capotosti F, Vokali E, Molette J, et al (2020) Developing a novel alpha-synuclein positron  
379 emission tomography (PET) tracer for the diagnosis of synucleinopathies. *Alzheimers*  
380 *Dement.* <https://doi.org/10.1002/alz.043249>
- 381 14. Hooshyar Yousefi B, Shi K, Arzberger T, Wester HJ, Schwaiger M, Yakushev I, Weber W  
382 (2019) Translational study of a novel alpha-synuclein PET tracer designed for first-in-  
383 human investigating. In: *NuklearMedizin 2019*. Georg Thieme Verlag KG, p L25
- 384 15. Kaide S, Watanabe H, Shimizu Y, Iikuni S, Nakamoto Y, Hasegawa M, Itoh K, Ono M  
385 (2020) Identification and Evaluation of Bisquinoline Scaffold as a New Candidate for  $\alpha$ -  
386 Synuclein-PET Imaging. *ACS Chem Neurosci* 11:4254–4261
- 387 16. Verdurand M, Levigoureux E, Zeinyeh W, et al (2018) In Silico, in Vitro, and in Vivo  
388 Evaluation of New Candidates for  $\alpha$ -Synuclein PET Imaging. *Mol Pharm* 15:3153–3166
- 389 17. Wagner J, Ryazanov S, Leonov A, et al (2013) Anle138b: a novel oligomer modulator for  
390 disease-modifying therapy of neurodegenerative diseases such as prion and Parkinson's  
391 disease. *Acta Neuropathol* 125:795–813
- 392 18. Heras-Garvin A, Weckbecker D, Ryazanov S, Leonov A, Griesinger C, Giese A, Wenning  
393 GK, Stefanova N (2019) Anle138b modulates  $\alpha$ -synuclein oligomerization and prevents  
394 motor decline and neurodegeneration in a mouse model of multiple system atrophy. *Mov*  
395 *Disord* 34:255–263
- 396 19. Maurer A, Leonov A, Ryazanov S, et al (2019) <sup>11</sup>C radiolabeling of anle253b: A putative  
397 PET tracer for Parkinson's disease that binds to alpha-synuclein fibrils in vitro and crosses  
398 the blood-brain barrier. *ChemMedChem.* <https://doi.org/10.1002/cmdc.201900689>
- 399 20. Raval NR, Nasser A, Madsen CA, et al (2022) An in vivo pig model for testing novel PET  
400 radioligands targeting cerebral protein aggregates. *bioRxiv* 2021.12.31.473908

- 401 21. Jørgensen LM, Baandrup AO, Mandeville J, Glud AN, Sørensen JCH, Weikop P,  
402 Jespersen B, Hansen AE, Thomsen C, Knudsen GM (2021) An FMRI-compatible system  
403 for targeted electrical stimulation. Research Square. [https://doi.org/10.21203/rs.3.rs-](https://doi.org/10.21203/rs.3.rs-313183/v1)  
404 313183/v1
- 405 22. Raval NR, Nasser A, Madsen CA, et al (2022) An in vivo pig model for testing novel PET  
406 radioligands targeting cerebral protein aggregates. bioRxiv 2021.12.31.473908
- 407 23. Sureau FC, Reader AJ, Comtat C, Leroy C, Ribeiro MJ, Buvat I, Trébossen R (2008)  
408 Impact of image-space resolution modeling for studies with the high-resolution research  
409 tomograph. J Nucl Med 49:1000–1008
- 410 24. Keller SH, Svarer C, Sibomana M (2013) Attenuation correction for the HRRT PET-scanner  
411 using transmission scatter correction and total variation regularization. IEEE Trans Med  
412 Imaging 32:1611–1621
- 413 25. Villadsen J, Hansen HD, Jørgensen LM, Keller SH, Andersen FL, Petersen IN, Knudsen  
414 GM, Svarer C (2017) Automatic delineation of brain regions on MRI and PET images from  
415 the pig. J Neurosci Methods 294:51–58
- 416 26. Saikali S, Meurice P, Sauleau P, Eliat P-A, Bellaud P, Randuineau G, Vérin M, Malbert C-H  
417 (2010) A three-dimensional digital segmented and deformable brain atlas of the domestic  
418 pig. J Neurosci Methods 192:102–109
- 419 27. Logan J, Fowler JS, Volkow ND, Wang GJ, Ding YS, Alexoff DL (1996) Distribution volume  
420 ratios without blood sampling from graphical analysis of PET data. J Cereb Blood Flow  
421 Metab 16:834–840
- 422 28. Lammertsma AA, Hume SP (1996) Simplified reference tissue model for PET receptor  
423 studies. Neuroimage 4:153–158

- 424 29. Barthel H, Sabri O (2017) Clinical Use and Utility of Amyloid Imaging. *J Nucl Med* 58:1711–  
425 1717
- 426 30. Shah M, Catafau AM (2014) Molecular Imaging Insights into Neurodegeneration: Focus on  
427 Tau PET Radiotracers. *J Nucl Med* 55:871–874
- 428 31. Eberling JL, Dave KD, Frasier MA (2013)  $\alpha$ -synuclein imaging: a critical need for  
429 Parkinson's disease research. *J Parkinsons Dis* 3:565–567
- 430 32. Klenner MA, Pascali G, Fraser BH, Darwish TA (2021) Kinetic isotope effects and synthetic  
431 strategies for deuterated carbon-11 and fluorine-18 labelled PET radiopharmaceuticals.  
432 *Nucl Med Biol* 96-97:112–147
- 433 33. Tang H, Mayersohn M (2018) Porcine prediction of pharmacokinetic parameters in people:  
434 A pig in a poke? *Drug Metab Dispos* 46:1712–1724
- 435 34. Alpha-Synuclein Imaging Prize. [https://www.michaeljfox.org/news/alpha-synuclein-imaging-](https://www.michaeljfox.org/news/alpha-synuclein-imaging-prize)  
436 [prize](https://www.michaeljfox.org/news/alpha-synuclein-imaging-prize). Accessed 24 Dec 2021
- 437 35. Peng C, Gathagan RJ, Lee VM-Y (2018) Distinct  $\alpha$ -Synuclein strains and implications for  
438 heterogeneity among  $\alpha$ -Synucleinopathies. *Neurobiol Dis* 109:209–218
- 439 36. Morgan SA, Lavenir I, Fan J, Masuda-Suzukake M, Passarella D, DeTure MA, Dickson  
440 DW, Ghetti B, Goedert M (2020)  $\alpha$ -Synuclein filaments from transgenic mouse and human  
441 synucleinopathy-containing brains are major seed-competent species. *J Biol Chem*  
442 295:6652–6664
- 443
- 444
- 445

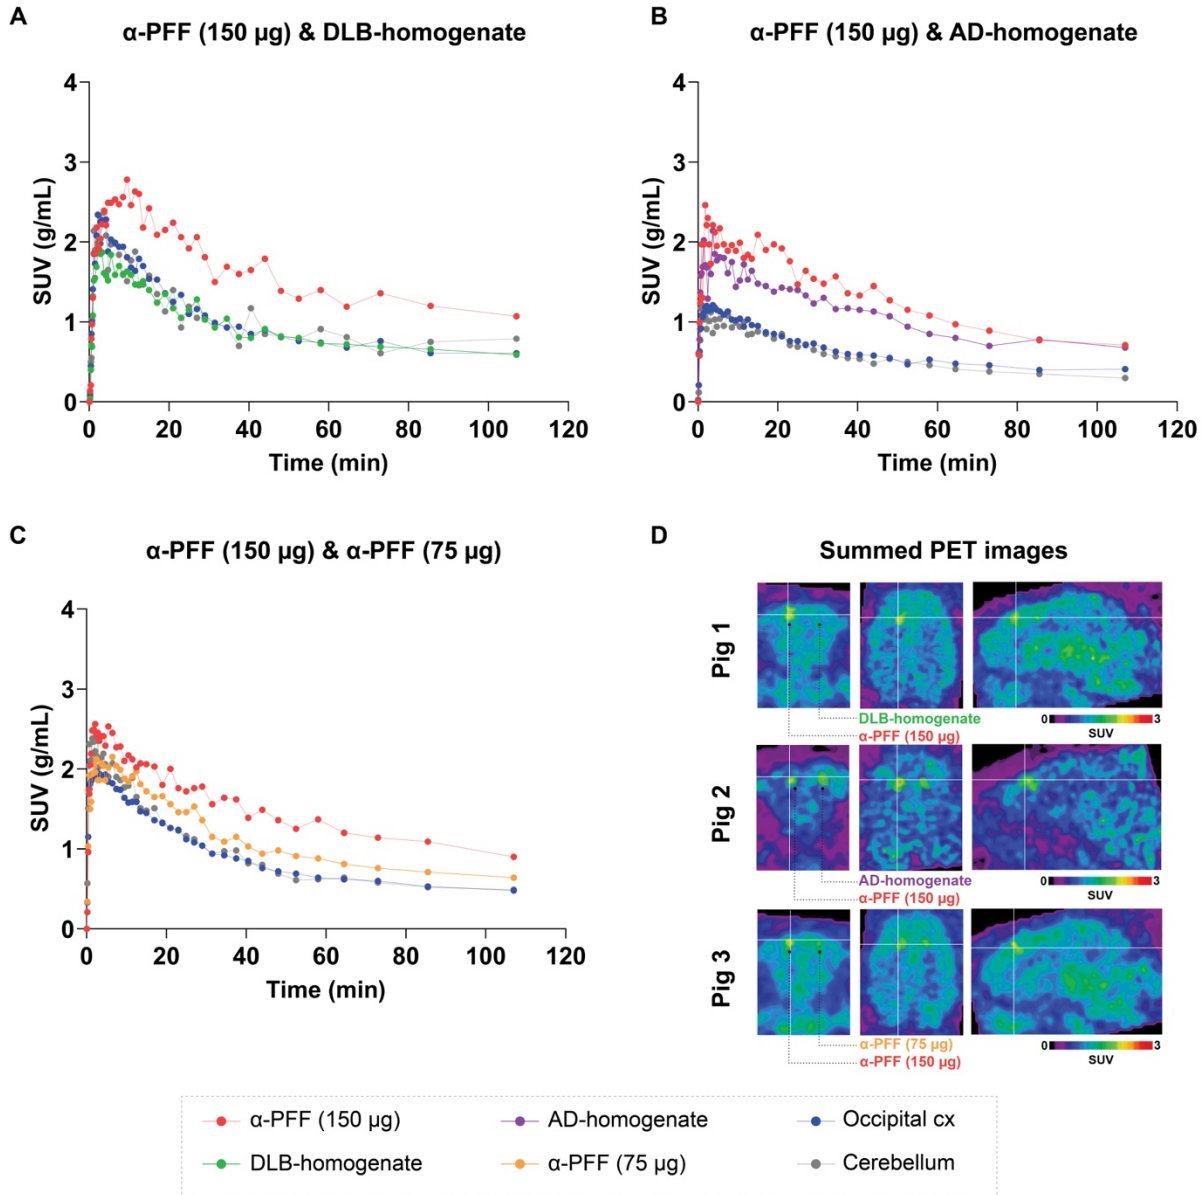

446

447 **Figure 1.** Regional TACs of  $(d_3)$ - $[^{11}C]$ MODAG-001 in pigs injected with 150  $\mu$ g  $\alpha$ -PFF and A)  
448 DLB homogenate, B) AD homogenate and C) 75  $\mu$ g  $\alpha$ -PFF. TACs for the two reference  
449 regions, ie, the occipital cortex and cerebellum, are also shown. D) SUV-scaled PET images  
450 from representative TACs.

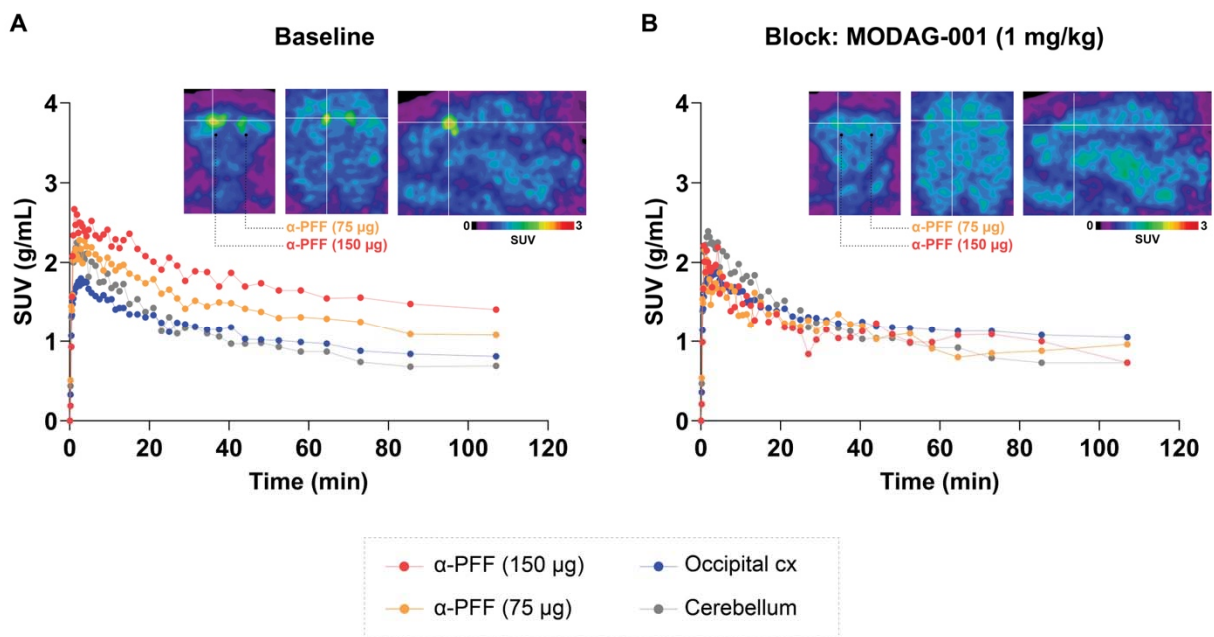

451  
 452 **Figure 2.** (d<sub>3</sub>)-[<sup>11</sup>C]MODAG-001 baseline and block. TACs and SUV scaled PET images A) (d<sub>3</sub>-  
 453 [<sup>11</sup>C]MODAG-001 baseline and B) (d<sub>3</sub>)-[<sup>11</sup>C]MODAG-001+ MODAG-001 (1 mg/kg) block scan  
 454 from a pig with 150 µg and 75 µg α-PFF.

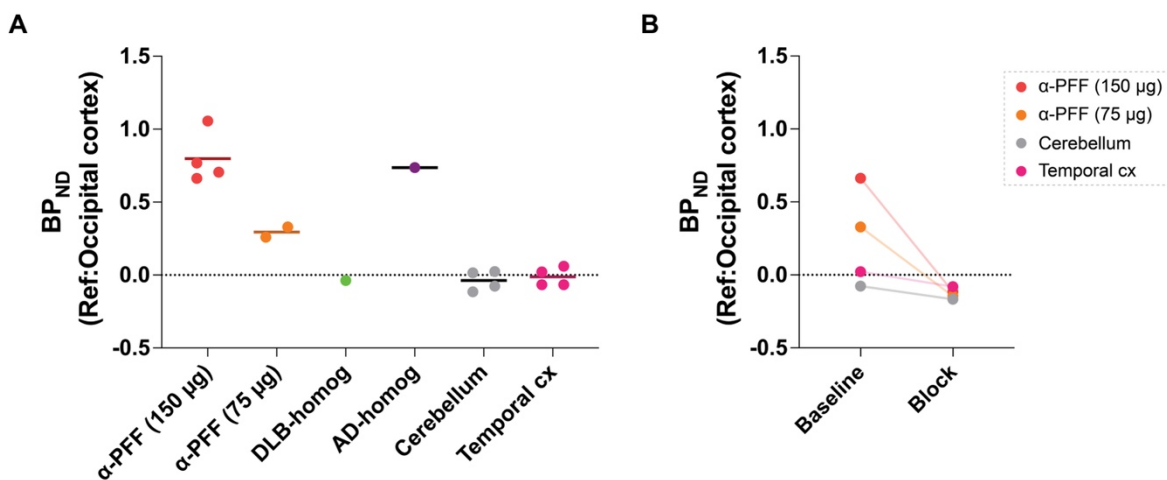

455  
 456 **Figure 3.** Kinetic modeling outcomes of (d<sub>3</sub>)-[<sup>11</sup>C]MODAG-001. A) BP<sub>ND</sub> as determined with the  
 457 non-invasive Logan graphical analysis using the occipital cortex as a reference region, in the  
 458 injected brain regions, temporal cortex, and cerebellum. Retest and block are not included. B)  
 459 BP<sub>ND</sub> at baseline after (d<sub>3</sub>)-[<sup>11</sup>C]MODAG-001 blocking.

460
